# Supplementary material for: Organic vs. conventional cocoa farming management: what is the relationship between agrobiodiversity, farming practices and cocoa tree health in Côte d'Ivoire?
Source: Research Square preprint supplement (doi:10.21203/rs.3.rs-6295383/v1), 2025-04-29
Supplement: Supplementary file 1 [file 3fdb4385c3ff5f38020fa79a.docx]

S1: List of species found in the 84 selected cocoa plots

| Vernacular name | Scientific name | Family | Species categories | Abundance |
| --- | --- | --- | --- | --- |
| Ackee | *Blighia sapida* | Sapindaceae | Woody species | 44 |
| Adjenifougale | *Millettia zechiana* | Fabaceae | Woody species | 205 |
| Ako | *Antiaris toxicaria* | Monaceae | Woody species | 29 |
| Akpi | *Ricinodendron heudelotii* | Euphorbiaceae | Woody species | 64 |
| *Albizia ferruginea* | *Albizia ferruginea* | Fabaceae | Woody species | 1 |
| *Albizia lebbeck* | *Albizia lebbeck* | Fabaceae | Woody species | 22 |
| *Albizia sp* | *Albizia_sp* | Fabaceae | Woody species | 144 |
| Aloma | *Ficus sur* | Moraceae | Woody species | 146 |
| Arbre à pain | *Myrianthus arboreus* | Cecropiaceae | Woody species | 2 |
| Avocado | *Persea americana* | Lauraceae | Commercially valuable species | 373 |
| Baobab | *Adansonia digitata* | Malvaceae | Woody species | 1 |
| Bete | *Mansonia altissima* | Malvaceae | Woody species | 14 |
| Brobro/wowoliwo | *Oxyanthus unilocularis Hiern* | Rubiaceae | Woody species | 19 |
| Calebassier | *Crescentia cujete* | Bignoniaceae | Woody species | 4 |
| carapa | *Carapa guianensis* | Meliaceae | Woody species | 2 |
| Cashew nut | *Anacardium occidentale* | Anacardiaceae | Commercially valuable species | 454 |
| Cassava | *Manihotesculenta* | Euphorbiaceae | Tuber | 3284 |
| Chat noir | *Dialium guineense* | Fabaceae | Woody species | 4 |
| Cocoman | *Sterculia tragacantha* | Malvaceae | Woody species | 4 |
| Coconut palm | *Cocos nucifera* | Aracaceae | Commercially valuable species | 11 |
| Coffee | *Coffea arabica* | Rubiaceae | Commercially valuable species | 1884 |
| Colatier | *Cola nitida* | Malvaceae | Commercially valuable species | 133 |
| Djeka | *Alchornea cordifolia* | Euphorbiaceae | Woody species | 16 |
| Emien | *Alstonia boonei* | Apocynaceae | Woody species | 17 |
| Essia/abala/macrocarpus | *Petersianthus macrocarpus* | Combretaceae | Woody species | 21 |
| *Ficus* | *Ficus sp* | Moraceae | Woody species | 2 |
| *Ficus exasperata* | *Ficus exasperata* | Moraceae | Woody species | 359 |
| *Ficus mucoso* | *Ficus mucoso* | Moraceae | Woody species | 2 |
| Frake/Fla | *Terminalia superba* | Combretaceae | Woody species | 60 |
| Framire | *Terminalia ivorensis* | Combretaceae | Woody species | 24 |
| Fromager | *Ceiba pentandra* | Malvaceae | Woody species | 236 |
| Gliricidia | *Gliricidiasepium* | Fabaceae | Woody species | 34 |
| Grapefruit | *Citrus maxina* | Rutaceae | Commercially valuable species | 61 |
| Guava | *Psidium guajava* | Myrtaceae | Commercially valuable species | 29 |
| Hevea | *Hevea brasiliensis* | Euphorbiaceae | Commercially valuable species | 130 |
| Hevea sauvage | *Funtumia elastica* | Apocynaceae | Woody species | 78 |
| Hysopeafricaine/Tonzoue | *Newbouldia laevis* | Bignoniaceae | Woody species | 52 |
| Ilomba/adrinh | *Pycnanthus angolensis* | Myristicaceae | Woody species | 37 |
| Iroko/Allah | *Milicia sp* | Moraceae | Woody species | 79 |
| Jatropha | *Jatropha gossypiifolia* | Euphorbiaceae | Woody species | 17 |
| Kapokier/Kpouka | *Bombax buonopozense* | Malvaceae | Woody species | 82 |
| Kotibe/Aya | *Nesogordonia papaverifera* | Malvaceae | Woody species | 149 |
| Kototche | *Sterculia tragacantha* | Malvaceae | Woody species | 88 |
| Koumossi | *Solanum eriantum* | Solanaceae | Woody species | 4 |
| Kpekpessia | *Margaritaria discoidea* | Phyllanthaceae | Woody species | 33 |
| Kple | *Irvingia gabonensis* | Irvingiaceae | Woody species | 1 |
| Lemon | *Citrus limon* | Rutaceae | Commercially valuable species | 34 |
| Mandarin | *Citrus reticulata* | Rutaceae | Commercially valuable species | 98 |
| Mango | *Mangifera indica* | Anacardiaceae | Commercially valuable species | 307 |
| Mirabellier | *Spondias mombin* | Anacardiaceae | Woody species | 96 |
| Moringa | *Moringa oleifera* | Moringaceae | Woody species | 15 |
| Neem | *Azadirachta indica* | Meliaceae | Woody species | 8 |
| Nere | *Parkia biglobosa* | Fabaceae | Woody species | 1 |
| Oil palm | *Elaeis guineensis* | Aracaceae | Commercially valuable species | 1060 |
| Orange | *Citrus sinensis* | Rutaceae | Commercially valuable species | 312 |
| Oruwo/Koya | *Morindalucida* | Rubiaceae | Woody species | 151 |
| Ouaragrand/Wale/Petit cola | *Cola gigantea* | Malvaceae | Commercially valuable species | 35 |
| Ouochi/Golikpankpa | *Albizia zygia* | Fabaceae | Woody species | 342 |
| Paletuvier | *Rhizophora racemosa* | Rhizophoraceae | Woody species | 1 |
| Papaya | *Carica papaya* | Caricaceae | Commercially valuable species | 350 |
| Parassolier | *Cecropia peltata* | Urticaceae | Woody species | 10 |
| Plantain banana | *Musa sp* | Musaceae | Banana | 7978 |
| Poivre africain/ Poivre long | *Xylopia aethiopica* | Annonaceae | Woody species | 1 |
| Raphia | *Raphia farinifera* | Aracaceae | Woody species | 0 |
| Samba | *Triplochiton scleroxylon* | Malvaceae | Woody species | 62 |
| Soursop | *Annona muricata* | Annonaceae | Commercially valuable species | 14 |
| Sweet banana | *Musa sp* | Musaceae | Banana | 762 |
| Teck | *Tectona grandis* | Lamiaceae | Woody species | 269 |
| Thevetia | *Cascabelathevetia* | Apocynaceae | Woody species | 7 |
| Tiama | *Entandrophragma angolense* | Meliaceae | Woody species | 1 |
| Tulipier du gabon/Biebiesrii | *Spathodea campanulata* | Bignoniaceae | Woody species | 68 |
| Yam | *Dioscorea sp* | Dioscoreaceae | Tuber | 1230 |
