# Supplementary material for: Organic vs. conventional cocoa farming management: what is the relationship between agrobiodiversity, farming practices and cocoa tree health in Côte d'Ivoire?
Source: Research Square preprint supplement (doi:10.21203/rs.3.rs-6295383/v1), 2025-04-29
Supplement: Supplementary file 2 [file 5152e43de001365f2ab5ddc8.docx]

S5: Comparison between healthy and less healthy zones in organic cocoa farms

| Variables | Healthy zone | Less healthy zone | TOTAL | Significance |
| --- | --- | --- | --- | --- |
| (N = 20) | (N = 19) | (N=39) |  |
| Mean ±SD | Mean ±SD | Mean ±SD |  |
| Specific richness | 11.0 ± 6.7 | 6.8 ± 5.5 | 8.9 ± 6.4 | 0.044* |
| Average stratum | 1.98 ± 0.42 | 1.92 ± 0.49 | 1.95 ± 0.45 | 0.7 |
| Basal Area | 10 ± 8 | 9 ± 7 | 9 ± 8 | 0.7 |
|  |  |  |  |  |
| Spatial layout |  |  |  |  |
| Aggregate | 2 (10%) | 1 (5.3%) | 3 (7.7%) | >0.9 |
| Random | 18 (90%) | 18 (95%) | 36 (92%) |
|  |  |  |  |  |
| Total density | 128 ± 73 | 94 ± 65 | 112 ± 70 | 0.2 |
| Density of timber trees | 26 ± 22 | 20 ± 26 | 23 ± 24 | 0.3 |
| Density of species with economical values | 46 ± 34 | 54 ± 54 | 49 ± 44 | >0.9 |
|  |
| Density of Banana Plants (Musa spp.) | 57 ± 63 | 20 ± 39 | 39 ± 55 | 0.022* |  |

The level of significance: • for p<0.1 (trend toward significance); p < 0.05*; **p < 0.01; ***p < 0.001.
