# Supplementary material for: Organic vs. conventional cocoa farming management: what is the relationship between agrobiodiversity, farming practices and cocoa tree health in Côte d'Ivoire?
Source: Research Square preprint supplement (doi:10.21203/rs.3.rs-6295383/v1), 2025-04-29
Supplement: Supplementary file 3 [file 5effde112fb1e1caae253ef4.docx]

S4: Comparison between healthy and less healthy zones identified in all cocoa plots based on agrobiodiversity structure variables

| Variables | Healthy zone | Less healthy zone | TOTAL | Significance |
| --- | --- | --- | --- | --- |
| (N = 35) | (N = 35) | (N=70) |
| Mean ±SD | Mean ±SD | Mean ±SD |
| Specific richness | 9.1 ± 6.0 | 6.0 ± 5.0 | 7.6 ± 5.7 | 0.018* |
| Average stratum | 1.82 ± 0.46 | 1.67 ± 0.51 | 1.74 ± 0.49 | 0.14 |
| Basal Area | 8 ± 8 | 9 ± 9 | 8 ± 9 | 0.8 |
| Total density | 129 ± 81 | 93 ± 68 | 111 ± 76 | 0.063 |
| Density of timber trees | 22 ± 23 | 18 ± 27 | 20 ± 25 | 0.2 |
| Density of species with economical values | 51 ± 49 | 46 ± 46 | 48 ± 47 | 0.6 |
|  |
| Density of Banana Plants (Musa spp.) | 57 ± 72 | 26 ± 39 | 41 ± 60 | 0.044* |  |
| Spatial layout |  |  |  |  |  |
| Aggregate | 5 (14.3%) | 2 (5.7%) | 7 (10.0%) | 0.4 |  |
| Random | 30 (85.7%) | 33 (94.3%) | 63 (90.0%) |  |

The level of significance: • for p<0.1 (trend toward significance); p < 0.05*; **p < 0.01; ***p < 0.001.
