# Supplementary material for: Organic vs. conventional cocoa farming management: what is the relationship between agrobiodiversity, farming practices and cocoa tree health in Côte d'Ivoire?
Source: Research Square preprint supplement (doi:10.21203/rs.3.rs-6295383/v1), 2025-04-29
Supplement: Supplementary file 4 [file 941b9e06b931080ceb6dfc71.docx]

S3: Comparison between organic and conventional cocoa plots based on agrobiodiversity structure variables and farming practices

| Variables | | Organic Farming | Conventional farming | TOTAL | Significance |
| --- | --- | --- | --- | --- | --- |
| (N = 20) | (N = 17) | (N = 37) |
| Mean ±SD | Mean ±SD | Mean ±SD |
| Specific richness | | 26 ± 10 | 17 ± 7 | 22 ± 10 | 0.008** |
| Average stratum | | 2.01 ± 0.38 | 1.54 ± 0.31 | 1.79 ± 0.42 | <0.001*** |
| Basal Area | | 16 ± 20 | 11 ± 12 | 13 ± 17 | 0.5 |
|  | |  |  |  |  |
| Total density | | 142 ± 65 | 117 ± 72 | 130 ± 69 | 0.2 |
| Density of timber trees | | 37 ± 30 | 16 ± 21 | 28 ± 28 | 0.004** |
| Density of species with economical values | | 49 ± 46 | 42 ± 35 | 46 ± 41 | 0.6 |
|  |
| Density of *Musa sp.* | | 56 ± 52 | 59 ± 65 | 57 ± 57 | >0.9 |  |
|  |  |  |  |  |  |  |
| Spatial layout | |  |  |  | 0.5 |  |
| Aggregate | | 16 (80.0%) | 11 (64.7%) | 27 (73.0%) |  |
| Random | | 4 (20.0%) | 6 (35.3%) | 10 (27.0%) |  |
|  |  |  |  |  |  |  |
| Manual Weeding | | 3.40 ± 1.23 | 3.53 ± 2.37 | 3.46 ± 1.82 | 0.7 |  |
|  |  |  |  |  |  |  |
| Chemical weeding | |  |  |  |  |  |
| Using Chemical weeding | | 0 (0.0%) | 17 (46%) | 37(100%) | 0.002** |  |
| Not using Chemical weeding | | 20 (54%) | 0 (0.0%) |  |
|  |  |  |  |  |  |  |
| Insecticide application | | 2.05 ± 2.19 | 1.76 ± 1.75 | 1.92 ± 1.98 | 0.8 |  |
|  |  |  |  |  |  |  |
| Type of pesticides | |  |  |  | <0.001*** |  |
| Using biopesticides | | 15 (75.0%) | 0 (0.0%) | 15 (40.5%) |  |
| No application of pesticides | | 5 (25.0%) | 7 (41.2%) | 12 (32.4%) |  |
| Using Synthetic pesticides | | 0 (0.0%) | 10 (58.8%) | 10 (27.0%) |  |
|  |  |  |  |  |  |  |
| Fertilizer application | |  |  |  |  |  |
| Using fertilizer | | 8 (40.0%) | 4 (23.5%) | 12 (32.4%) | 0.3 |  |
| Not using Fertilizer | | 0 (0.0%) | 0 (0.0%) |  |
|  |  |  |  |  |  |  |
| Type of fertilizer | |  |  |  | 0.3 |  |
| Organic fertilizer | | 7 (35.0%) | 2 (11.8%) | 9 (24.3%) |  |
| Synthetic fertilizer | | 1 (5.0%) | 2 (11.8%) | 3 (8.1%) |  |
| No application | | 12 (60.0%) | 13 (76.5%) | 25 (67.6%) |  |

The level of significance: • for p<0.1 (trend toward significance); p < 0.05*; **p < 0.01; ***p < 0.001.
