# Supplementary material for: Organic vs. conventional cocoa farming management: what is the relationship between agrobiodiversity, farming practices and cocoa tree health in Côte d'Ivoire?
Source: Research Square preprint supplement (doi:10.21203/rs.3.rs-6295383/v1), 2025-04-29
Supplement: Supplementary file 5 [file a95d23e86d3e4bca06022e7f.docx]

S2: Comparison of densities by species category between organic and conventional plots at the scale of the 84 selected plots

| Variables | Organic Farming | Conventional farming | TOTAL | Significance |
| --- | --- | --- | --- | --- |
| (N = 44) | (N = 40) | (N= 84) |
| Mean ±SD | Mean ±SD | Mean ±SD |
| Density of commercially valuable species | 29 ± 22 | 30 ± 31 | 30 ± 27 | 0.4 NS |
| Density of others woody species | 44 ± 40 | 11 ± 9 | 28 ± 34 | <0.001*** |
| Density of Banana Plants (Musa spp.) | 53 ± 65 | 46 ± 52 | 50 ± 59 | 0.6 NS |
| Density of Tubers | 50 ± 60 | 6 ± 9 | 29 ± 49 | <0.001*** |
| Total density | 165 ± 105 | 93 ± 56 | 130 ± 92 | 0.001** |

The level of significance: NS at p > 0.1. • for p<0.1 (trend toward significance); p < 0.05*;

**p < 0.01; ***p < 0.001.
